# Supplementary material for: High Throughput Discovery of Complex Metal Oxide Electrocatalysts for the Oxygen Reduction Reaction
Source: Springer Nature journal article supplement (doi:10.1007/s12678-021-00694-3), 2021-10-29
Supplement: MOESM1 [file 12678_2021_694_MOESM1_ESM.pdf]

## Supporting Information

# High throughput discovery of complex metal oxide electrocatalysts for the oxygen reduction reaction

Dan Guevarra, Joel A. Haber, Yu Wang, Lan Zhou, Kevin Kan, Matthias H. Richter, John M. Gregoire

Figure S1 provides a summary of non-transition metal modification of the activity of transition metal oxides. As noted in the manuscript, the transition metal oxides provide most of the catalytic activity, and to survey the many composition spaces of the high throughput campaign, we consider the propensity for additional non-transition metal elements to increase or decrease activity. In the figure,  $x = 0$  corresponds to the set of catalyst compositions with any combination of Mn, Ni, and Fe with no additional elements. Upon adding 10%-20% of an additional element, only Mg and Ca increase the median activity, and for higher concentrations, the general trend is decreasing activity with decreasing concentration of the transition metal concentration.

**Note on reporting of electrochemical potential:** Our Ag/AgCl reference electrodes are 2.0 M KCl and are calibrated against a commercial BASi Ag/AgCl reference electrode stored in 3.0M NaCl. A 12 mV offset is added to the reference calibration to account for the difference in Cl- concentrations. The reference electrode potential versus RHE was calculated for the 1.0 M NaOH working electrolyte using pH values measured by pH meter at room temperature.

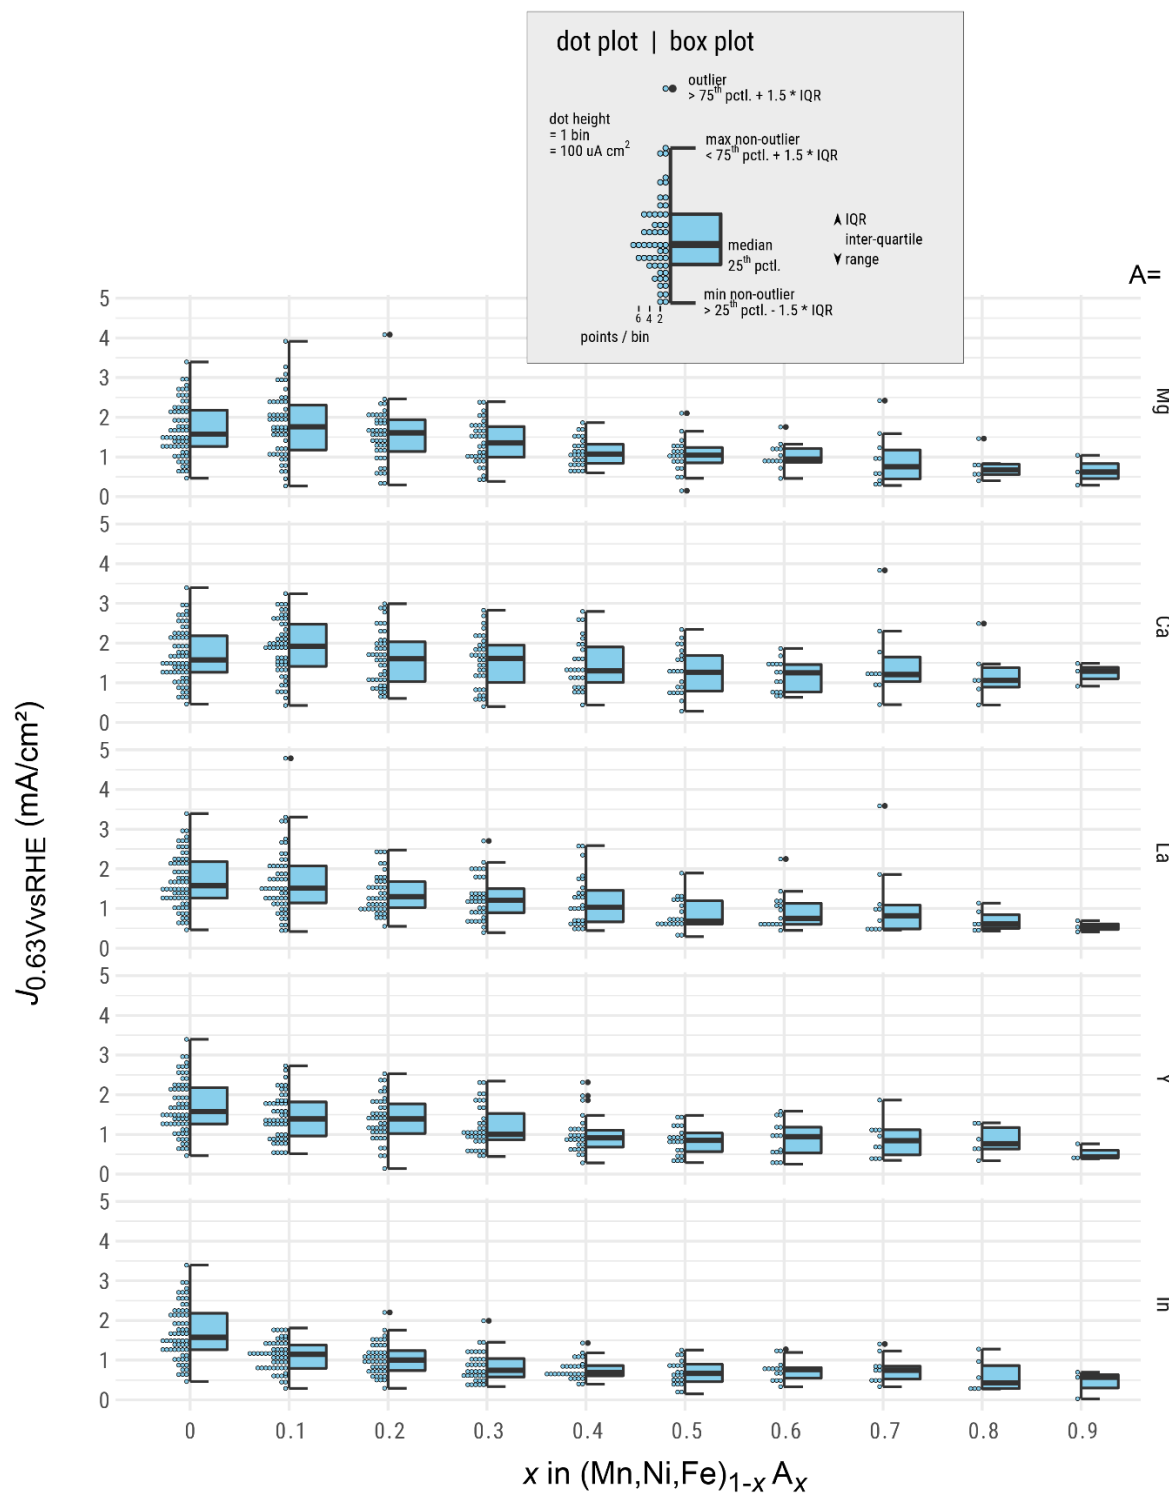

Figure S1: Summary of non-transition metal modification of the activity of transition metal oxides. For each of the 5 non-transition metal elements ( $A = \text{Mg}, \text{Ca}, \text{La}, \text{Y}, \text{In}$ ) and each of their concentrations with respect to the sum of the transition metals ( $x = 0, 0.1, \dots, 0.9$ ), the figure contains a hybrid dot-box plot that provides information on the distribution of the activities as well as statistics such as the median and interquartile range.

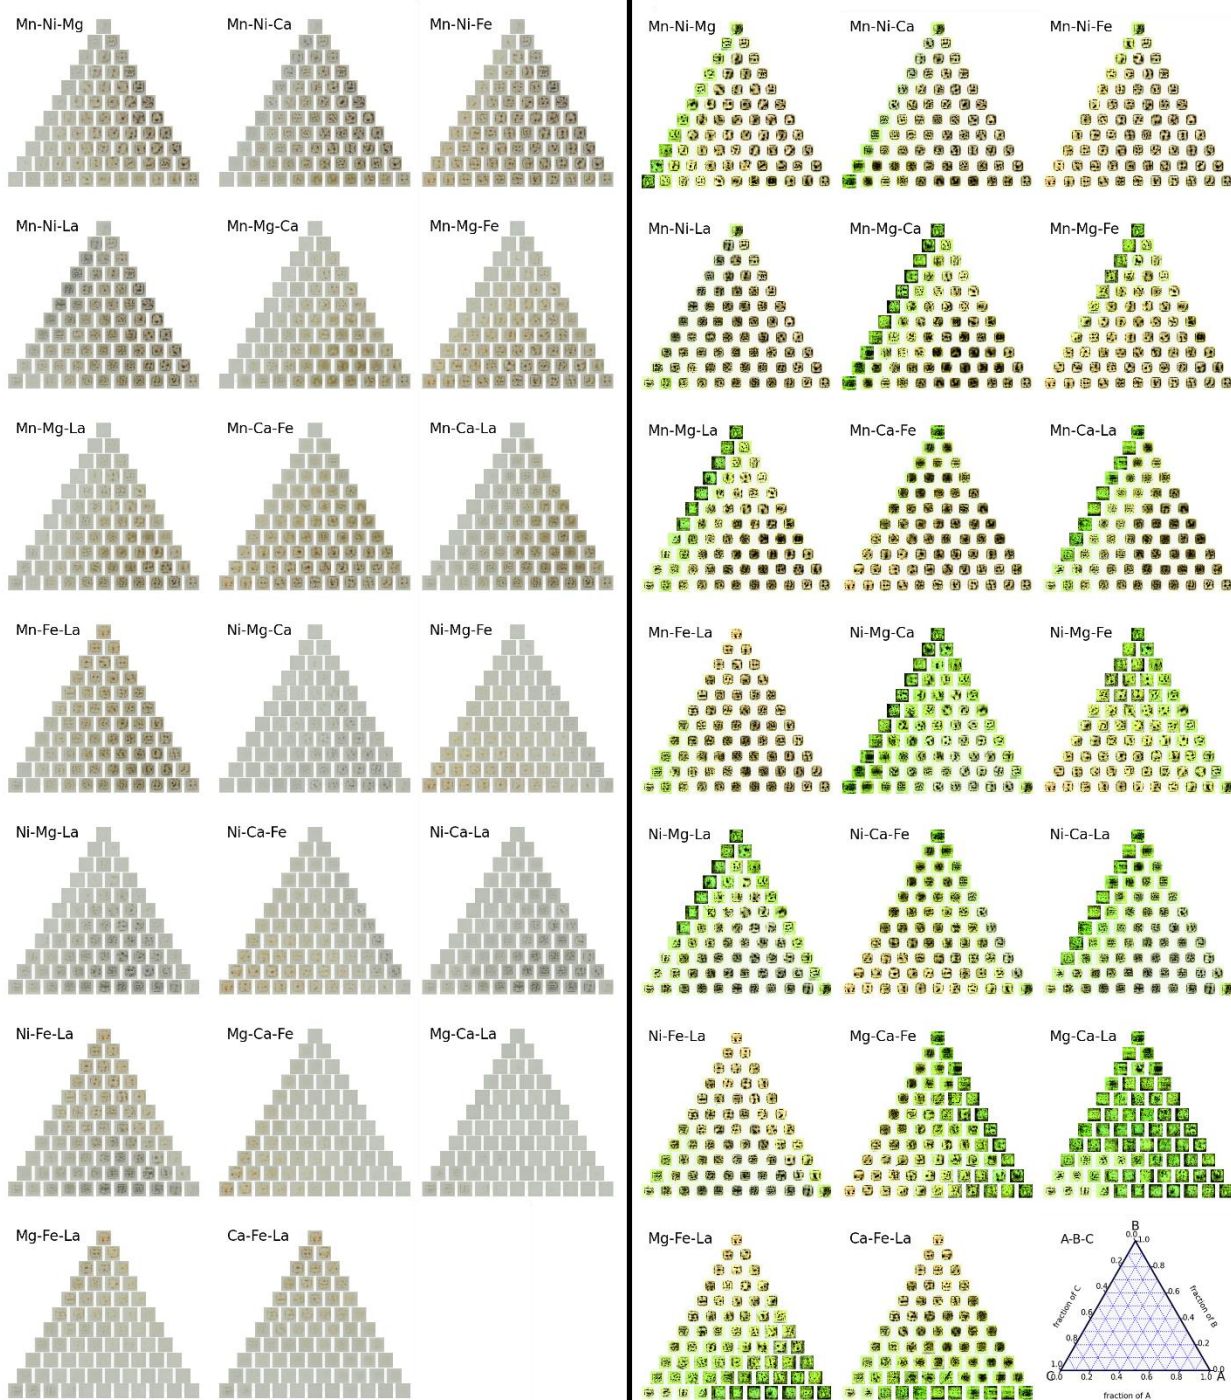

Figure S2: Mn-Ni-Mg-Ca-Fe-La oxide samples was digitally imaged at 1200 dpi using an Epson document scanner. Each of the 20 3-cation combinations of these elements is shown as a triangle composition plot reconstructed from  $1 \times 1 \text{ mm}^2$  images of the printed samples. The left-hand side contains the raw images from the scanner and the right-hand side contains modified versions that enhance the contrast (especially for high transparency samples like Ca and Mg) by rescaling using a min value as the 5<sup>th</sup> percentile and max value as the 95<sup>th</sup> percentile for each channel, followed by exposure equalization.

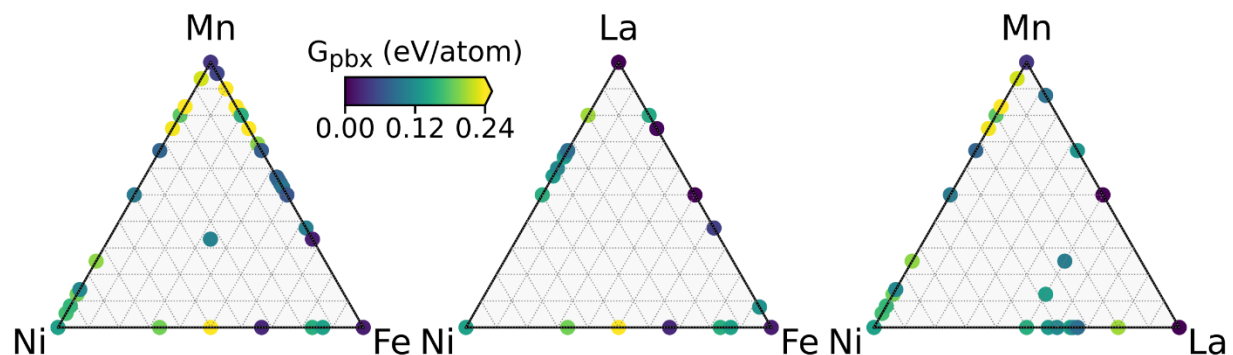

Figure S3: At pH 14 and 0.63 V vs RHE, the energy above the Pourbaix hull for known phases at various cation compositions is shown (elemental ionic concentration  $10^{-8}$  M). Each point corresponds to a different metal oxide formula and is colored by the minimum energy above hull for all known phases at that cation composition. This analysis shows that all 2-cation composition systems contain known phases that are near or on the Pourbaix hull.

Table S1: The Materials Project entries corresponding to Fig. S3. For each material, the solid state energy above hull is shown to assess the contribution to the Pourbaix energy above hull from the solid state energy above hull. The Pourbaix energy above hull is at 0.63 V vs RHE, pH 14, and 1e-8 M elemental aqueous concentration.

| material_id | pretty_formula | Energy above hull (eV/atom) |          | material_id | pretty_formula | Energy above hull (eV/atom) |          |
|-------------|----------------|-----------------------------|----------|-------------|----------------|-----------------------------|----------|
|             |                | Solid state                 | Pourbaix |             |                | Solid state                 | Pourbaix |
| mp-1172875  | Mn2O3          | 0.000                       | 0.036    | mp-35596    | Fe2NiO4        | 0.000                       | 0.028    |
| mp-19009    | NiO            | 0.000                       | 0.135    | mp-1225019  | Fe5NiO8        | 0.089                       | 0.151    |
| mp-19770    | Fe2O3          | 0.000                       | 0.018    | mp-757258   | Fe13(NiO10)2   | 0.067                       | 0.137    |
| mp-2292     | La2O3          | 0.000                       | 0.000    | mp-574915   | LaFe12O19      | 0.088                       | 0.121    |
| mp-757698   | Mn23FeO32      | 0.014                       | 0.050    | mp-1189182  | LaMn7O12       | 0.064                       | 0.091    |
| mp-753618   | Mn9FeO10       | 0.035                       | 0.249    | mp-21444    | LaMn2O5        | 0.083                       | 0.122    |
| mp-755276   | Mn5FeO12       | 0.064                       | 0.237    | mp-1223093  | La4Mn(NiO4)3   | 0.026                       | 0.134    |
| mp-771188   | Mn13Fe3O32     | 0.080                       | 0.256    | mp-1188812  | La2MnNiO6      | 0.042                       | 0.101    |
| mp-754261   | La4FeO8        | 0.086                       | 0.144    | mp-531717   | La5Mn5O16      | 0.000                       | 0.000    |
| mp-757061   | Mn4FeO8        | 0.093                       | 0.152    | mp-1076121  | La2Ni2O5       | 0.091                       | 0.151    |
| mp-1180667  | La3FeO6        | 0.005                       | 0.005    | mp-558316   | La4Ni3O10      | 0.020                       | 0.129    |
| mp-756788   | Mn3FeO8        | 0.067                       | 0.250    | mp-18926    | La3Ni2O7       | 0.023                       | 0.112    |
| mp-769622   | Mn9(FeO6)4     | 0.081                       | 0.198    | mp-757549   | La9Ni5O19      | 0.084                       | 0.140    |
| mp-1221897  | MnFeNiO4       | 0.060                       | 0.105    | mp-1178158  | La15(NiO4)8    | 0.049                       | 0.117    |
| mp-754642   | Mn2FeO4        | 0.042                       | 0.071    | mp-21874    | La2NiO4        | 0.047                       | 0.086    |
| mp-640147   | Fe(NiO2)2      | 0.010                       | 0.189    | mp-510747   | La4NiO8        | 0.087                       | 0.206    |
| mp-532236   | Mn17Fe13O40    | 0.050                       | 0.076    | mp-758680   | Mn(Ni9O10)2    | 0.041                       | 0.168    |
| mp-1222437  | Mn5(FeO3)4     | 0.050                       | 0.076    | mp-758834   | Mn3(Ni17O20)2  | 0.037                       | 0.160    |
| mp-762538   | Mn13Fe11O32    | 0.053                       | 0.079    | mp-1221343  | MnNi7O8        | 0.045                       | 0.188    |
| mp-706492   | Mn19Fe17O48    | 0.068                       | 0.094    | mp-19442    | Mn(Ni3O4)2     | 0.000                       | 0.113    |
| mp-1078634  | LaFeO3         | 0.000                       | 0.000    | mp-759859   | MnNi3O4        | 0.049                       | 0.199    |
| mp-674482   | MnFeO3         | 0.036                       | 0.063    | mp-19331    | MnNiO3         | 0.000                       | 0.098    |
| mp-1276430  | FeNiO3         | 0.078                       | 0.275    | mp-36843    | Mn2NiO4        | 0.012                       | 0.076    |
| mp-1212003  | La3Fe5O12      | 0.040                       | 0.044    | mp-776651   | Mn3NiO4        | 0.052                       | 0.235    |
| mp-757662   | Mn3Fe5O12      | 0.077                       | 0.102    | mp-757060   | Mn4NiO8        | 0.093                       | 0.180    |
| mp-18750    | Mn(FeO2)2      | 0.000                       | 0.020    |             |                |                             |          |
